# Supplementary material for: XA-Novo: an accurate and high-throughput mass spectrometry-based de novo sequencing technology for monoclonal antibodies and antibody mixtures
Source: Research Square preprint supplement (doi:10.21203/rs.3.rs-5789240/v1), 2025-02-07
Supplement: Supplementary file 1 [file 7547e2d449c9ee32268a3b40.xlsx]

## Sheet: ReadMe
Sequencing coverage was calculated as the percentage of amino acids of the antibody sequence that were covered by assembled contig. Sequencing accuracy was calculated as the percentage of all annotated sequence calls that were labeled correctly.
To comprehensively evaluate the performance of sequence assembly, we employed the metric of accurate coverage, defined as the percentage of amino acids of the antibody sequence that were correctly covered by assembled contig, equal to the product of coverage and accuracy.

## Sheet: Casanovo-denovo-Peptidecount
ALC>=50
	count
SA55	12423
50µg S2P6	15303
100µg S2P6	15851
200µg S2P6	21967
85F7	29993
36H6	27218
2B4	32862

## Sheet: Casanovo-denovo
whole chain										V(D)J
		HC.count	HC.proportion	LC.count	LC.proportion	count	proportion					HC.count	HC.proportion	LC.count	LC.proportion	count	proportion
SA55	95	2116	0.302156	1272	0.181636	3388	0.483793			SA55	95	364	0.0519777	621	0.0886763	985	0.140654
	90	2311	0.250787	1353	0.146826	3664	0.397613				90	399	0.043299	663	0.0719479	1062	0.115247
	85	2332	0.220499	1359	0.128498	3691	0.348998				85	402	0.0380106	666	0.0629728	1068	0.100983
	50	2333	0.187797	1360	0.109474	3693	0.297271				50	402	0.0323593	666	0.0536102	1068	0.0859696
50µg S2P6	95	2887	0.341092	1066	0.125945	3953	0.467037			50µg S2P6	95	569	0.0672259	541	0.0639178	1110	0.131144
	90	3266	0.280007	1200	0.102881	4466	0.382887				90	644	0.0552126	604	0.0517833	1248	0.106996
	85	3326	0.251076	1216	0.0917944	4542	0.34287				85	662	0.0499736	615	0.0464256	1277	0.0963992
	50	3330	0.217604	1217	0.0795269	4547	0.297131				50	664	0.0433902	615	0.0401882	1279	0.0835784
100µg S2P6	95	3576	0.404205	1539	0.173957	5115	0.578162			100µg S2P6	95	745	0.0842093	788	0.0890697	1533	0.173279
	90	4036	0.334993	1700	0.141102	5736	0.476096				90	830	0.0688911	884	0.0733732	1714	0.142264
	85	4094	0.298549	1721	0.125501	5815	0.42405				85	840	0.0612557	893	0.0651207	1733	0.126376
	50	4097	0.25847	1725	0.108826	5822	0.367295				50	841	0.0530566	894	0.0564002	1735	0.109457
200µg S2P6	95	4950	0.39149	2579	0.20397	7529	0.59546			200µg S2P6	95	910	0.0719709	1210	0.0956976	2120	0.167668
	90	5670	0.330189	2841	0.165444	8511	0.495632				90	1017	0.0592243	1329	0.0773934	2346	0.136618
	85	5761	0.297526	2872	0.148324	8633	0.44585				85	1034	0.0534008	1339	0.0691525	2373	0.122553
	50	5767	0.26253	2877	0.130969	8644	0.393499				50	1036	0.0471616	1341	0.0610461	2377	0.108208
										85F7	95	894	0.0463669	922	0.0478191	1816	0.094186
											90	960	0.0403802	981	0.0412636	1941	0.0816438
											85	964	0.0366554	988	0.037568	1952	0.0742233
											50	964	0.0321408	988	0.032941	1952	0.0650818
										36H6	95	1006	0.0594563	849	0.0501773	1855	0.109634
											90	1068	0.0506041	911	0.0431651	1979	0.0937692
											85	1072	0.045276	915	0.0386451	1987	0.0839211
											50	1072	0.0393857	915	0.0336175	1987	0.0730032
										2B4	95	825	0.041055	899	0.0447375	1724	0.0857925
											90	895	0.0349336	972	0.0379391	1867	0.0728728
											85	899	0.0313295	979	0.0341174	1878	0.0654469
											50	899	0.0273568	979	0.0297912	1878	0.0571481

## Sheet: Casanovo_Stitch
				CDR			whole chain
	version	ALC	chain	accurate coverage	insertion	gap	accurate coverage	insertion	gap
SA55	1.5	95	LC	0.8947	0	2	0.9907	0	2
			HC	0.5588	0	12	0.9648	0	12
		90	LC	0.8947	0	2	0.9907	0	2
			HC	0.5588	0	12	0.9648	0	12
		85	LC	0.8947	0	2	0.9907	0	2
			HC	0.5588	0	12	0.9626	0	12
		50	LC	0.8947	0	2	0.9907	0	2
			HC	0.5	0	11	0.9582	0	11
	1.4	95	LC	0.9474	0	1	0.9953	0	1
			HC	0.8235	0	5	0.9824	0	5
		90	LC	0.9474	0	1	0.9953	0	1
			HC	0.7647	0	5	0.9758	0	5
		85	LC	0.9474	0	1	0.9953	0	1
			HC	0.7647	0	5	0.9758	0	5
		50	LC	0.9474	0	1	0.9953	0	1
			HC	0.6471	0	8	0.967	0	8
50µg S2P6	1.5	95	LC	0.9048	0	2	0.9862	0	2
			HC	1	0	0	0.9888	0	1
		90	LC	0.9048	0	2	0.9816	0	2
			HC	1	0	0	0.9911	0	1
		85	LC	0.9048	0	2	0.9816	0	2
			HC	1	0	0	0.9911	0	1
		50	LC	0.9048	0	2	0.9816	0	2
			HC	1	0	0	0.9933	0	1
	1.4	95	LC	0.9048	0	2	0.9862	1	2
			HC	1	10	0	0.9911	12	0
		90	LC	0.9048	0	2	0.9862	1	2
			HC	1	0	0	0.9933	0	0
		85	LC	0.9048	0	2	0.9862	1	2
			HC	1	0	0	0.9933	0	0
		50	LC	0.9048	0	2	0.9862	1	2
			HC	1	0	0	0.9933	0	0
100µg S2P6	1.5	95	LC	0.9048	0	2	0.9908	0	2
			HC	1	0	0	0.9821	0	1
		90	LC	0.9048	0	2	0.9908	0	2
			HC	1	0	0	0.9933	0	1
		85	LC	0.9048	0	2	0.9908	0	2
			HC	1	0	0	0.9978	0	0
		50	LC	0.9048	0	2	0.9908	0	2
			HC	0.8889	10	0	0.9911	10	0
	1.4	95	LC	0.9048	0	2	0.9908	0	2
			HC	1	0	0	0.9911	1	0
		90	LC	0.9048	0	2	0.9908	0	2
			HC	0.9259	0	1	0.9911	0	1
		85	LC	0.9048	0	2	0.9908	0	2
			HC	0.9259	0	1	0.9911	0	1
		50	LC	0.9048	0	2	0.9908	0	2
			HC	0.9259	0	1	0.9911	0	1
200µg S2P6	1.5	95	LC	0.9048	0	2	0.9908	0	2
			HC	1	0	0	0.9933	0	1
		90	LC	0.9048	0	2	0.9908	0	2
			HC	1	0	0	0.9933	0	1
		85	LC	0.9048	0	2	0.9908	0	2
			HC	1	0	0	0.9933	0	1
		50	LC	0.9048	0	2	0.9908	0	2
			HC	0.963	2	0	0.9911	2	1
	1.4	95	LC	0.9048	0	2	0.9908	0	2
			HC	1	0	0	0.9933	1	0
		90	LC	0.9048	0	2	0.9908	0	2
			HC	1	0	0	0.9955	0	0
		85	LC	0.9048	0	2	0.9908	1	2
			HC	0.963	0	0	0.9933	0	0
		50	LC	0.9048	0	2	0.9908	0	2
			HC	0.963	0	0	0.9933	0	0

## Sheet: Casanovo_Stitch-modified
				CDR			whole chain								CDR			V(D)J
	version	ALC	chain	accurate coverage	insertion	gap	accurate coverage	insertion	gap			version	ALC	chain	accurate coverage	insertion	gap	accurate coverage	insertion	gap
SA55	1.5	95	LC	1	4	0	1	4	0		85F7	1.5	95	LC	1	1	0	0.9906	1	0
			HC	0.5588	0	12	0.9648	0	12					HC	1	0	0	0.9576	0	0
		90	LC	1	0	0	1	2	0				90	LC	1	1	0	0.9906	1	0
			HC	0.5588	0	12	0.9648	0	12					HC	1	0	0	0.9661	0	0
		85	LC	1	0	0	1	0	0				85	LC	1	1	0	0.9906	1	0
			HC	0.5588	0	12	0.9626	0	12					HC	1	0	0	0.9661	0	0
		50	LC	1	0	0	1	0	0				50	LC	1	1	0	0.9906	1	0
			HC	0.5	0	11	0.9582	0	11					HC	1	0	0	0.9661	0	0
	1.4	95	LC	0.8421	4	0	0.986	4	3			1.4	95	LC	1	1	0	0.9906	1	0
			HC	0.7941	0	5	0.9824	0	5					HC	0.963	0	0	0.9831	0	0
		90	LC	1	0	0	1	0	0				90	LC	1	1	0	0.9906	1	0
			HC	0.7647	0	5	0.9758	0	5					HC	0.8889	0	2	0.9492	0	3
		85	LC	1	0	0	1	0	0				85	LC	1	1	0	0.9906	1	0
			HC	0.7647	0	5	0.9758	0	5					HC	0.8889	0	2	0.9492	0	3
		50	LC	1	0	0	1	0	0				50	LC	1	1	0	0.9906	1	0
			HC	0.6471	0	8	0.967	0	8					HC	0.8889	0	2	0.9492	0	3
50µg S2P6	1.5	95	LC	1	1	0	0.9954	1	0		36H6	1.5	95	LC	1	0	0	1	0	0
			HC	1	0	0	0.9888	0	0					HC	1	0	0	0.9833	0	0
		90	LC	1	0	0	0.9908	5	0				90	LC	1	0	0	1	0	0
			HC	1	0	0	0.9911	0	1					HC	0.8966	9	1	0.9583	9	1
		85	LC	1	0	0	0.9908	12	0				85	LC	1	0	0	1	0	0
			HC	1	0	0	0.9911	0	1					HC	0.931	7	0	0.9667	7	0
		50	LC	1	16	0	0.9908	16	0				50	LC	1	0	0	1	0	0
			HC	1	0	0	0.9933	0	1					HC	0.931	8	0	0.9667	8	0
	1.4	95	LC	1	0	0	0.9954	1	0			1.4	95	LC	1	0	0	1	0	0
			HC	1	11	0	0.9911	13	0					HC	1	0	0	0.9917	0	0
		90	LC	1	0	0	0.9954	1	0				90	LC	1	0	0	1	0	0
			HC	1	0	0	0.9933	0	0					HC	1	15	0	0.9917	15	0
		85	LC	1	28	0	0.9954	29	0				85	LC	1	0	0	1	0	0
			HC	1	0	0	0.9933	0	0					HC	0.8966	3	1	0.925	3	3
		50	LC	1	27	0	0.9954	28	0				50	LC	1	0	0	1	0	0
			HC	1	0	0	0.967	0	0					HC	0.8966	3	1	0.925	3	3
100µg S2P6	1.5	95	LC	1	0	0	1	0	0		2B4	1.5	95	LC	1	0	0	0.9912	0	0
			HC	1	0	0	0.9821	0	1					HC	0.9643	2	0	0.958	2	0
		90	LC	1	0	0	1	5	0				90	LC	1	0	0	1	0	0
			HC	1	0	0	0.9933	0	1					HC	0.8929	2	0	0.9496	2	0
		85	LC	1	0	0	1	10	0				85	LC	1	0	0	1	0	0
			HC	1	0	0	0.9978	0	0					HC	0.8929	2	0	0.9496	2	0
		50	LC	1	0	0	1	13	0				50	LC	1	0	0	1	0	0
			HC	1	0	0	0.9978	0	0					HC	0.9643	8	0	0.9664	8	0
	1.4	95	LC	1	0	0	1	0	0			1.4	95	LC	1	0	0	0.9912	0	0
			HC	1	0	0	0.9911	1	0					HC	1	0	0	0.9496	0	0
		90	LC	1	0	0	1	0	0				90	LC	1	0	0	1	0	0
			HC	0.9259	0	1	0.9911	0	1					HC	0.8929	0	0	0.9496	0	0
		85	LC	1	21	0	1	21	0				85	LC	1	0	0	1	0	0
			HC	0.9259	0	1	0.9911	0	1					HC	0.9643	3	0	0.9664	3	0
		50	LC	1	26	0	1	26	0				50	LC	1	0	0	1	0	0
			HC	0.9259	0	1	0.9911	0	1					HC	0.9643	3	0	0.9664	3	0
200µg S2P6	1.5	95	LC	1	0	0	1	5	0
			HC	1	0	0	0.9933	0	1
		90	LC	1	0	0	0.9954	10	0
			HC	1	0	0	0.9933	0	1
		85	LC	1	0	0	1	10	0
			HC	1	0	0	0.9933	0	1
		50	LC	1	0	0	1	13	0
			HC	0.963	2	0	0.9911	2	1
	1.4	95	LC	1	0	0	1	0	0
			HC	1	0	0	0.9933	1	0
		90	LC	1	0	0	0.9954	0	0
			HC	1	0	0	0.9955	0	0
		85	LC	1	21	0	1	22	0
			HC	0.963	0	0	0.9933	0	0
		50	LC	1	18	0	1	18	0
			HC	0.963	0	0	0.9933	0	0

## Sheet: Casanovo-Assembly-result
			CDR			whole chain							CDR			V(D)J
	algorithm	chain	accurate coverage	insertion	gap	accurate coverage	insertion	gap			algorithm	chain	accurate coverage	insertion	gap	accurate coverage	insertion	gap
SA55	Fusion	LC	1	0	0	1	0	0		85F7	Fusion	LC	1	0	0	0.9906	0	0
		HC	1	0	0	1	0	0				HC	1	0	0	0.9915	0	0
	Stitch	LC	1	0	0	1	0	0			Stitch	LC	1	1	0	0.9906	1	0
		HC	0.7647	0	5	0.9758	0	5				HC	0.963	0	0	0.9831	0	0
	PEAKS AB	LC	1	0	0	1	0	0			PEAKS AB	LC	1	0	0	0.9434	0	0
		HC	1	0	0	1	0	0				HC	1	0	0	0.9831	0	0
50µg S2P6	Fusion	LC	1	0	0	1	0	0		36H6	Fusion	LC	1	0	0	1	0	0
		HC	1	0	0	1	0	0				HC	1	0	0	1	0	0
	Stitch	LC	1	0	0	0.9954	1	0			Stitch	LC	1	0	0	1	0	0
		HC	1	0	0	0.9933	0	0				HC	1	0	0	0.9917	0	0
	PEAKS AB	LC	1	0	0	1	0	0			PEAKS AB	LC	0.625	0	7	0.8673	0	8
		HC	1	0	0	1	0	0				HC	1	0	0	1	0	0
100µg S2P6	Fusion	LC	1	0	0	1	0	0		2B4	Fusion	LC	1	0	0	1	0	0
		HC	1	0	0	1	0	0				HC	1	0	0	0.9916	0	0
	Stitch	LC	1	0	0	1	0	0			Stitch	LC	1	0	0	0.9912	0	0
		HC	1	0	0	0.9911	1	0				HC	1	0	0	0.9496	0	0
	PEAKS AB	LC	1	0	0	1	0	0			PEAKS AB	LC	1	0	0	1	0	0
		HC	1	0	0	1	0	0				HC	0.9286	3	0	0.9664	3	0
200µg S2P6	Fusion	LC	1	0	0	1	0	0
		HC	1	0	0	1	0	0
	Stitch	LC	1	0	0	0.9954	0	0
		HC	1	0	0	0.9955	0	0
	PEAKS AB	LC	1	0	0	1	0	0
		HC	1	0	0	1	0	0

## Sheet: Casanovo-Assembly-summary
/	/	/	CDR			whole chain				/	/	/	CDR			V(D)J
antibody	algorithm	chain	accurate coverage	insertion	gap	accurate coverage	insertion	gap		antibody	algorithm	chain	accurate coverage	insertion	gap	accurate coverage	insertion	gap
SA55	Fusion	LC	1	0	0	1	0	0		85F7	Fusion	LC	1	0	0	0.9906	0	0
		HC	1	0	0	1	0	0				HC	1	0	0	0.9915	0	0
	Stitch	LC	1	0	0	1	0	0			Stitch	LC	1	1	0	0.9906	1	0
		HC	0.7647	0	5	0.9758	0	5				HC	0.963	0	0	0.9831	0	0
	PEAKS AB	LC	1	0	0	1	0	0			PEAKS AB	LC	1	0	0	0.9434	0	0
		HC	1	0	0	1	0	0				HC	1	0	0	0.9831	0	0
50µg S2P6	Fusion	LC	1	0	0	1	0	0		36H6	Fusion	LC	1	0	0	1	0	0
		HC	1	0	0	1	0	0				HC	1	0	0	1	0	0
	Stitch	LC	1	0	0	0.9954	1	0			Stitch	LC	1	0	0	1	0	0
		HC	1	0	0	0.9933	0	0				HC	1	0	0	0.9917	0	0
	PEAKS AB	LC	1	0	0	1	0	0			PEAKS AB	LC	0.625	0	7	0.8673	0	8
		HC	1	0	0	1	0	0				HC	1	0	0	1	0	0
100µg S2P6	Fusion	LC	1	0	0	1	0	0		2B4	Fusion	LC	1	0	0	1	0	0
		HC	1	0	0	1	0	0				HC	1	0	0	0.9916	0	0
	Stitch	LC	1	0	0	1	0	0			Stitch	LC	1	0	0	0.9912	0	0
		HC	1	0	0	0.9911	1	0				HC	1	0	0	0.9496	0	0
	PEAKS AB	LC	1	0	0	1	0	0			PEAKS AB	LC	1	0	0	1	0	0
		HC	1	0	0	1	0	0				HC	0.9286	3	0	0.9664	3	0
200µg S2P6	Fusion	LC	1	0	0	1	0	0
		HC	1	0	0	1	0	0
	Stitch	LC	1	0	0	0.9954	0	0
		HC	1	0	0	0.9955	0	0
	PEAKS AB	LC	1	0	0	1	0	0
		HC	1	0	0	1	0	0

## Sheet: PEAKS-denovo
whole chain										V(D)J
		HC.count	HC.proportion	LC.count	LC.proportion	count	proportion					HC.count	HC.proportion	LC.count	LC.proportion	count	proportion
SA55	95	628	0.24783	421	0.16614	1049	0.41397			SA55	95	121	0.0477506	145	0.0572218	266	0.104972
	90	1018	0.181235	696	0.12391	1714	0.305145				90	198	0.0352501	270	0.0480684	468	0.0833185
	85	1244	0.14253	838	0.0960128	2082	0.238543				85	236	0.0270394	339	0.0388405	575	0.0658799
	50	1531	0.0455045	1088	0.0323376	2619	0.0778422				50	301	0.00894635	471	0.0139991	772	0.0229455
S2P6-50µg	95	1133	0.35252	376	0.116988	1509	0.469508			S2P6-50µg	95	324	0.100809	139	0.0432483	463	0.144057
	90	2078	0.286542	776	0.107005	2854	0.393547				90	620	0.0854937	343	0.0472973	963	0.132791
	85	2571	0.231705	1002	0.0903028	3573	0.322008				85	791	0.071287	482	0.0434391	1273	0.114726
	50	3290	0.0827236	1406	0.0353524	4696	0.118076				50	1023	0.0257223	718	0.0180534	1741	0.0437756
S2P6-100µg	95	1308	0.395525	577	0.174478	1885	0.570003			S2P6-100µg	95	349	0.105534	210	0.0635017	559	0.169035
	90	2541	0.329017	1166	0.150978	3707	0.479995				90	711	0.0920627	508	0.0657776	1219	0.15784
	85	3190	0.264292	1546	0.128086	4736	0.392378				85	904	0.0748964	739	0.0612262	1643	0.136123
	50	4109	0.096512	2086	0.0489959	6195	0.145508				50	1164	0.02734	1049	0.0246389	2213	0.0519789
S2P6-200µg	95	1170	0.381107	646	0.210424	1816	0.591531			S2P6-200µg	95	242	0.0788274	189	0.0615635	431	0.140391
	90	2649	0.307309	1544	0.179118	4193	0.486427				90	610	0.0707657	626	0.0726218	1236	0.143387
	85	3817	0.251665	2198	0.14492	6015	0.396585				85	931	0.0613833	1030	0.0679106	1961	0.129294
	50	5122	0.0851481	3176	0.0527978	8298	0.137946				50	1247	0.0207301	1605	0.0266815	2852	0.0474116
										85F7	95	168	0.0682649	170	0.0690776	338	0.137343
											90	262	0.0481795	255	0.0468922	517	0.0950717
											85	304	0.034142	296	0.0332435	600	0.0673854
											50	432	0.00964501	437	0.00975664	869	0.0194016
										36H6	95	132	0.0730089	143	0.0790929	275	0.152102
											90	248	0.0585044	246	0.0580326	494	0.116537
											85	305	0.0424791	307	0.0427577	612	0.0852368
											50	439	0.011023	480	0.0120524	919	0.0230754
										2B4	95	82	0.0415611	80	0.0405474	162	0.0821085
											90	139	0.0290917	139	0.0290917	278	0.0581833
											85	184	0.0222787	187	0.022642	371	0.0449207
											50	307	0.0064697	338	0.00712299	645	0.0135927

## Sheet: PEAKS_Stitch
				CDR			whole chain
	version	ALC	chain	accurate coverage	insertion	gap	accurate coverage	insertion	gap
SA55	1.5	95	LC	0.8947	0	2	0.9907	0	2
			HC	0.4706	0	12	0.9429	4	12
		90	LC	0.8947	0	2	0.9814	0	2
			HC	0.6471	0	12	0.9582	0	12
		85	LC	0.8947	0	2	0.9814	0	2
			HC	0.5882	0	8	0.9648	0	8
		50	LC	0.9474	0	1	0.9953	0	1
			HC	0.5294	9	6	0.9626	9	6
	1.4	95	LC	0.9474	0	1	0.9907	1	1
			HC	0.5882	0	11	0.9538	1	11
		90	LC	0.9474	0	1	0.9907	1	1
			HC	0.7059	0	5	0.9692	0	5
		85	LC	0.9474	0	1	0.9907	1	1
			HC	0.6765	0	4	0.967	0	4
		50	LC	0.9474	0	1	0.9953	0	1
			HC	0.5588	10	2	0.9626	10	2
50µg S2P6	1.5	95	LC	0.7143	0	2	0.9631	0	2
			HC	1	0	0	0.9955	2	0
		90	LC	0.9048	0	2	0.9908	0	2
			HC	1	0	0	0.9933	0	0
		85	LC	0.9048	0	2	0.9908	0	2
			HC	1	0	0	0.9955	0	0
		50	LC	0.8571	0	2	0.9862	0	2
			HC	1	0	0	0.9978	0	0
	1.4	95	LC	0.7143	0	2	0.9724	1	2
			HC	1	0	0	0.9866	0	0
		90	LC	0.9048	0	2	0.9908	0	2
			HC	1	0	0	0.9933	0	0
		85	LC	0.9048	0	2	0.9908	0	2
			HC	1	0	0	0.9955	0	0
		50	LC	0.9048	0	2	0.9908	0	2
			HC	1	0	0	0.9978	0	0
100µg S2P6	1.5	95	LC	0.9048	0	2	0.9677	1	2
			HC	1	0	0	0.9933	1	0
		90	LC	0.9048	0	2	0.9908	1	2
			HC	1	0	0	0.9888	0	0
		85	LC	0.9048	0	2	0.9908	0	2
			HC	1	0	0	0.9933	0	0
		50	LC	0.9048	0	2	0.9908	0	2
			HC	1	0	0	0.9978	0	0
	1.4	95	LC	0.9048	0	2	0.9862	1	2
			HC	1	0	0	0.9933	3	0
		90	LC	0.9048	0	2	0.9908	0	2
			HC	1	0	0	0.9911	0	0
		85	LC	0.9048	0	2	0.9908	0	2
			HC	1	0	0	0.9955	0	0
		50	LC	0.9048	0	2	0.9908	0	2
			HC	1	0	0	0.9978	0	0
200µg S2P6	1.5	95	LC	0.9048	0	2	0.9908	0	2
			HC	1	0	0	0.9664	1	0
		90	LC	0.9048	0	2	0.9816	1	2
			HC	1	0	0	0.9955	0	0
		85	LC	0.9048	0	2	0.9908	0	2
			HC	1	0	0	0.9978	0	0
		50	LC	0.9048	0	2	0.9908	0	2
			HC	1	0	0	0.9978	0	0
	1.4	95	LC	0.9048	0	2	0.9908	0	2
			HC	1	0	0	0.9776	2	0
		90	LC	0.9048	0	2	0.9862	0	2
			HC	1	0	0	0.9955	0	0
		85	LC	0.9048	0	2	0.9908	0	2
			HC	1	0	0	0.9978	0	0
		50	LC	90.48	0	2	0.9908	0	2
			HC	1	0	0	0.9978	0	0

## Sheet: PEAKS_Stitch-modified
				CDR			whole chain								CDR			V(D)J
	version	ALC	chain	accurate coverage	insertion	gap	accurate coverage	insertion	gap			version	ALC	chain	accurate coverage	insertion	gap	accurate coverage	insertion	gap
SA55	1.5	95	LC	1	0	0	1	0	0		85F7	1.5	95	LC	0.9412	1	0	0.9434	8	0
			HC	0.4706	0	12	0.9429	4	12					HC	1	1	0	0.9322	2	0
		90	LC	1	0	0	0.9907	0	0				90	LC	1	2	0	0.9623	2	0
			HC	0.5588	0	12	0.9582	0	12					HC	0.963	3	0	0.9322	5	0
		85	LC	1	1	0	0.9907	1	0				85	LC	1	1	0	0.9811	1	1
			HC	0.5882	0	8	0.9648	0	8					HC	1	1	0	0.9492	2	0
		50	LC	1	0	0	1	14	0				50	LC	1	1	0	0.9906	1	0
			HC	0.5294	9	6	0.9626	9	6					HC	1	13	0	0.9746	13	0
	1.4	95	LC	1	0	0	0.9953	1	0			1.4	95	LC	0.9412	1	0	0.9811	1	0
			HC	0.5882	0	11	0.9538	1	11					HC	0.8889	9	0	0.8983	10	0
		90	LC	1	0	0	0.9953	1	0				90	LC	1	1	0	0.9906	1	0
			HC	0.7059	0	5	0.9692	0	5					HC	0.963	12	1	0.9407	11	2
		85	LC	1	0	0	0.9953	1	0				85	LC	1	1	0	0.9906	1	0
			HC	0.7059	0	8	0.9692	0	8					HC	0.7407	1	0	0.8814	1	0
		50	LC	1	0	0	0.9953	0	0				50	LC	1	1	0	0.9906	1	0
			HC	0.5588	2	10	0.9648	2	10					HC	0.8889	33	0	0.9492	34	0
50µg S2P6	1.5	95	LC	0.8095	0	0	0.9724	5	0		36H6	1.5	95	LC	0.9583	0	0	0.9558	0	0
			HC	1	0	0	0.9955	2	0					HC	0.8276	0	3	0.9	0	3
		90	LC	1	0	0	1	5	0				90	LC	1	0	0	1	0	0
			HC	1	0	0	0.9933	0	0					HC	1	1	0	0.9667	1	0
		85	LC	1	0	0	1	5	0				85	LC	1	0	0	1	0	0
			HC	1	0	0	0.9955	0	0					HC	1	1	0	0.9833	1	0
		50	LC	0.9524	27	0	0.9954	27	0				50	LC	1	0	0	1	0	0
			HC	1	0	0	0.9978	0	0					HC	0.8966	5	0	0.9667	5	0
	1.4	95	LC	0.8095	0	0	0.9816	1	0			1.4	95	LC	0.9167	0	0	0.9558	0	0
			HC	1	0	0	0.9866	0	0					HC	0.7586	0	4	0.875	0	4
		90	LC	1	0	0	1	0	0				90	LC	0.9583	0	0	0.9735	0	0
			HC	1	0	0	0.9933	0	0					HC	1	0	0	0.975	0	0
		85	LC	1	0	0	1	0	0				85	LC	1	0	0	1	0	0
			HC	1	0	0	0.9955	0	0					HC	1	0	0	0.9917	0	0
		50	LC	1	30	0	1	30	0				50	LC	1	0	0	1	0	0
			HC	1	0	0	0.9978	0	0					HC	0.8276	0	0	0.9417	0	0
100µg S2P6	1.5	95	LC	1	0	0	0.977	6	0		2B4	1.5	95	LC	0.7143	0	0	0.8938	0	0
			HC	1	0	0	0.9933	1	0					HC	0.8929	0	0	0.9076	0	2
		90	LC	1	0	0	1	6	0				90	LC	1	0	0	0.9735	0	0
			HC	1	0	0	0.9888	0	0					HC	0.9286	0	0	0.9412	0	0
		85	LC	1	0	0	1	5	0				85	LC	1	0	0	0.9823	0	0
			HC	1	0	0	0.9933	0	0					HC	0.9643	1	0	0.9496	1	1
		50	LC	1	0	0	1	11	0				50	LC	1	0	0	1	0	0
			HC	1	0	0	0.9978	0	0					HC	1	0	0	0.9664	0	0
	1.4	95	LC	1	0	0	0.9954	1	0			1.4	95	LC	0.7083	0	0	0.8938	1	0
			HC	1	0	0	0.9933	3	0					HC	0.8929	0	1	0.8824	5	3
		90	LC	1	0	0	1	0	0				90	LC	1	0	0	0.9735	0	0
			HC	1	0	0	0.9911	0	0					HC	0.9643	0	0	0.9412	3	0
		85	LC	1	0	0	1	0	0				85	LC	1	0	0	0.9823	0	0
			HC	1	0	0	0.9955	0	0					HC	0.9286	0	0	0.9328	1	2
		50	LC	1	31	0	1	31	0				50	LC	1	0	0	1	0	0
			HC	1	0	0	0.9978	0	0					HC	1	9	0	0.9664	9	0
200µg S2P6	1.5	95	LC	1	0	0	1	4	0
			HC	1	0	0	0.9664	1	0
		90	LC	1	0	0	0.9908	7	0
			HC	1	0	0	0.9955	0	0
		85	LC	1	0	0	1	5	0
			HC	1	0	0	0.9978	0	0
		50	LC	0.9524	0	0	0.9908	8	0
			HC	1	0	0	0.9978	0	0
	1.4	95	LC	1	0	0	1	0	0
			HC	1	0	0	0.9776	2	0
		90	LC	0.9524	0	0	0.9862	0	0
			HC	1	0	0	0.9955	0	0
		85	LC	0.9524	0	0	0.9816	0	0
			HC	1	0	0	0.9978	0	0
		50	LC	1	30	0	1	30	0
			HC	1	0	0	0.9978	0	0

[truncated: 2 more sheets: PEAKS-Assembly-result, PEAKS-Assembly-result-summary]
